# Supplementary material for: Lab in a tube: a fast-assembled colorimetric sensor for highly sensitive detection of oligonucleotides based on a hybridization chain reaction
Source: Royal Society of Chemistry journal article supplement (doi:10.1039/c5ra04613k), 2015-01-01
Supplement: c5ra04613k1.pdf [file c5ra04613k1.pdf]

1 **Lab in a tube: a fast-assembled colorimetric sensor for**  
2 **highly sensitive detection of oligonucleotides based on**  
3 **hybridization chain reaction**

4 Siqi Zhang<sup>a</sup>, Kun Wang<sup>b</sup>, Zhenyu Li<sup>a</sup>, Zhongmin Feng<sup>a</sup>, Ting Sun<sup>a\*</sup>

5 <sup>a</sup> College of Sciences, Northeastern University, Shenyang, 110819, China

6 <sup>b</sup> Department of Chemistry and Environmental Engineering, Changchun University of  
7 Science and Technology, Changchun, China

8 \*Corresponding author

9 E-mail: sun1th@163.com

10 Tel.: +86-024-83684786;

11

12 **Second structure of H<sub>1</sub> and H<sub>2</sub>**

13 As shown in Figure S6 (supporting information), the CD spectra of hairpin H<sub>1</sub>  
14 and H<sub>1</sub> contains a positive long wavelength band or bands at about 260–280nm and a  
15 negative band around 245 nm. According to the previous report<sup>1</sup>, the hairpins are the  
16 B-form DNA.

17

18 **The mechanism of yellow color development**

19 3,5,3',5'-Tetramethylbenzidine is a common chromogenic substrate of  
20 peroxidase enzymes such as horseradish peroxidase. Its one- or two-electron  
21 oxidation develops a blue- or yellow-colored product, respectively<sup>2</sup>. The sequences of  
22 reactions that seem to be involved in the colorimetric T<sub>HBV</sub> determination technique  
23 are summarized below:

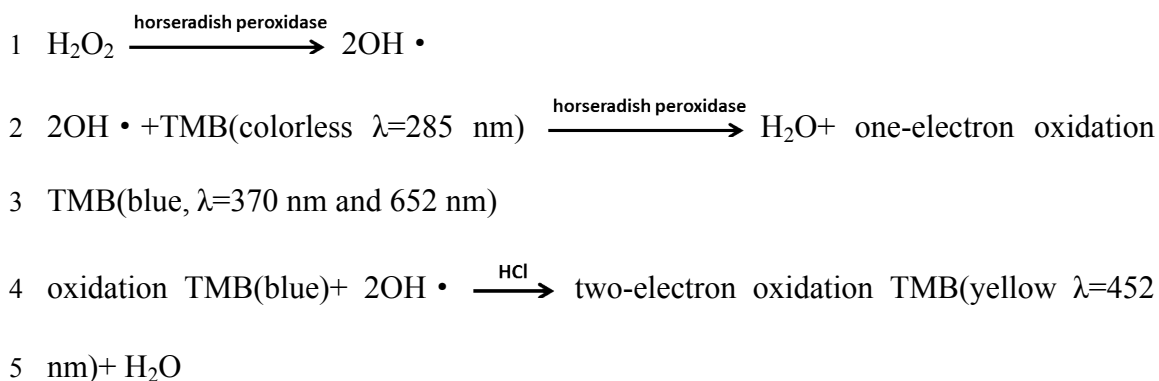

6 As shown in scheme 1, the system can form G-quadruplex upon addition of

7  $\text{T}_{\text{HBV}}$ . G-quadruplexes can bind hemin to form a kind of DNAzyme which will mimic

8 catalytic activity like horseradish peroxidase (HRP) in the presence of  $\text{K}^+$ . It has been

9 proven that in the presence of the DNAzymes,  $\text{H}_2\text{O}_2$ -mediated oxidation of TMB

10 could be sharply speeded up compared to the conditions without DNAzymes. In

11 visible region, no peak for TMB was appeared initially, so the TMB was colorless.

12 While  $\text{H}_2\text{O}_2$  gradually oxidized TMB, two new peaks appear, at 370 and 652 nm. The

13 compounds appear blue. Upon addition of 1M HCl, one- electron oxidation TMB was

14 transformed into two- electron oxidation TMB and these peaks were replaced by a

15 peak at 452 nm.

16

### 17 **Optimization of the experimental parameters**

18 As shown in Figure S3, raising the temperature will contribute to speed up the

19 DNA self-assembly efficiently. The rate of rise for the DNA self-assembly slows

20 gradually when experiment was conducted above  $25^\circ\text{C}$ . In consideration of

21 convenience of experimental operation, the  $25^\circ\text{C}$  (room temperature) was chosen as

22 the reaction temperature.

1 Other experimental parameters (e.g. pH value,  $K^+$  concentration, and  $Mg^{2+}$   
2 concentration) that effect the self-assembly of the colorimetric biosensor were  
3 optimized and exhibited in Figure S8. The effect of the absorbance to pH value  
4 ranging from 5 to 9 was investigated. As shown in Figure S8A, the absorbance  
5 showed no obvious undulation at different pH values. In order to simplify working  
6 processes, 8 was chosen as the reasonable pH value. Other experimental parameters  
7 which need to optimized are  $K^+$  and  $Mg^{2+}$  concentration. The effect of the absorbance  
8 to  $K^+$  concentration ranging from 0 mM to 25 mM was investigated. Since  $K^+$  can  
9 help the G-quadruplex form a stable hemin/G-quadruplex structure, increasing  $K^+$   
10 concentration is favorable to accelerate the DNA self-assembly. As shown in Figure  
11 S8B, the absorbance gradually increased until adding 15 mM  $K^+$ . Then a further  
12 increase of  $K^+$  concentration could not make the absorbance rise. Thus 15 mM was  
13 chosen as the reasonable  $K^+$  concentration. And the effect of the absorbance to  $Mg^{2+}$   
14 concentration ranging from 0 mM to 10 mM was also investigated. As shown in  
15 Figure S8C, the absorbance rose slowly with the  $Mg^{2+}$  concentration increasing.  
16 According to this result, we selected 5 mM  $Mg^{2+}$  concentration in the throughout  
17 experiment.

### 18 **Array detection for target DNA using multiple of 96 samples**

19 We also develop a low-cost oligonucleotides analysis platform for target DNA  
20 using multiple of 96 samples. We select numerous mutations at different positions of  
21 target sequence, such as single base mismatches in segment A of target DNA, ( $T_{1AA}$ ,  
22  $T_{1AC}$ ,  $T_{1AG}$ ), in segment B ( $T_{1B}$ ) and in segment C ( $T_{1C}$ ) of target DNA, two-base

1 mismatches located in different segments of target DNA, (T<sub>2AB</sub>, T<sub>2AC</sub>, T<sub>2BC</sub>) and a  
2 three-base mismatch (T<sub>3</sub>). The detailed sequence of the oligonucleotide is listed as  
3 follows:

4 T<sub>HBV</sub>: 5'-AGTTACTC TCTTTTTTG CCTTCTGA-3'

5 T<sub>1AG</sub>: 5'-AGTTACTC TCTTTTTTG GCTTCTGA-3'

6 T<sub>1AA</sub>: 5'-AGTTACTC TCTTTTTTG ACTTCTGA-3'

7 T<sub>1AT</sub>: 5'-AGTTACTC TCTTTTTTG ICTTCTGA-3'

8 T<sub>1B</sub>: 5-AGTTACTC TCTTATTTG CCTTCTGA-3

9 T<sub>1C</sub>: 5-AGTTACTI TCTTTTTTG CCTTCTGA-3

10 T<sub>2AB</sub>: 5-AGTTACTC TCTTATTTG ACTTCTGA-3

11 T<sub>2BC</sub>: 5-AGTTACTI TCTTATTTG CCTTCTGA-3

12 T<sub>3</sub>: 5-AGTTACTI TCTTATTTG ACTTCTGA-3

13 Each mutation was prepared in different concentrations (0 nM, 0.1 nM, 1 nM, 10  
14 nM, 30 nM, 50 nM, 70 nM, 100 nM). The analysis experiment was conducted in a  
15 multiple of 96 samples. As shown in Figure S9, the target DNA of the proper  
16 concentration can be recognized just by bare eye. So we believe our method has  
17 potential for high-throughput screening.

18

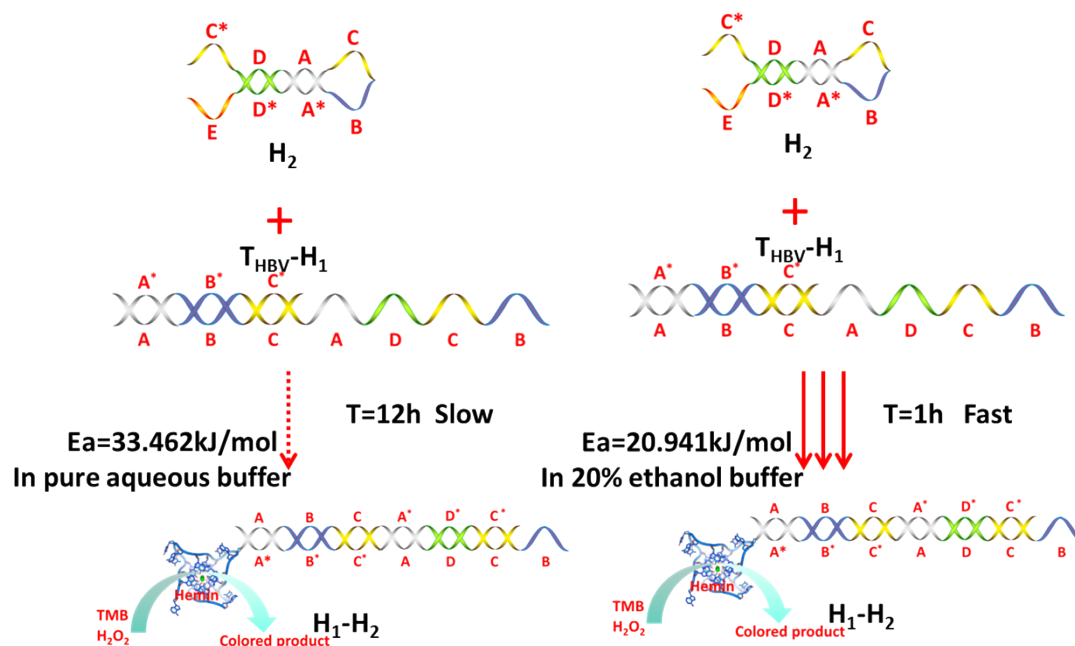

1

2 Fig. S1 (a) hybridization chain reaction in buffer solution and 20% ethanol solution.

3

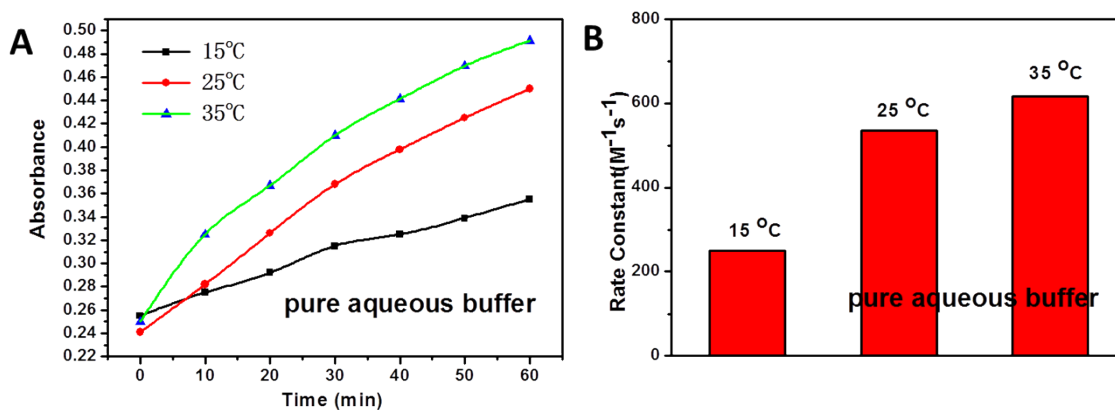

4

5 Fig. S2 (A) UV-vis absorbance of the hybridization chain reaction for system at

6 different temperatures in pure aqueous buffer in 60 min. (B) The rate constant of the

7 hybridization chain reaction for system at different temperatures in pure aqueous

8 buffer after 1 h.  $[H_1]=100\text{ nM}$ ,  $[H_2]=100\text{ nM}$ ,  $[T_{HBV}]=50\text{ nM}$ .

9

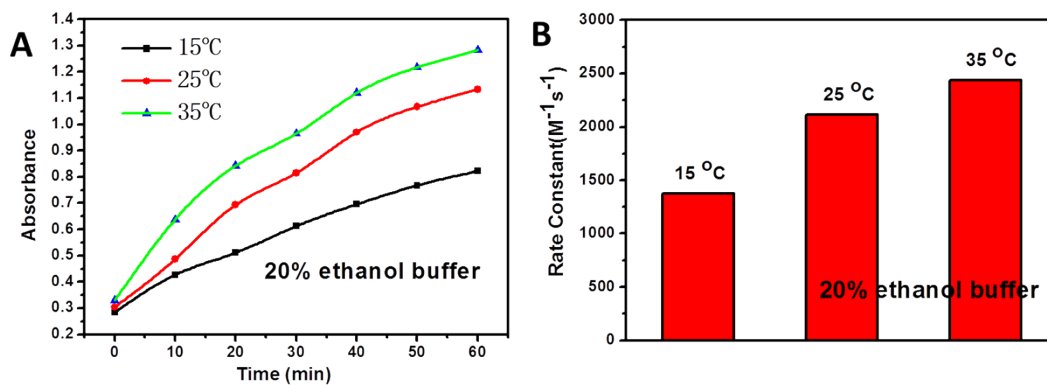

1

2 Fig. S3 (A) UV-vis absorbance of the hybridization chain reaction for system at  
 3 different temperatures in 20% ethanol buffer in 60 min. (B) The rate constant of the  
 4 hybridization chain reaction for system at different temperatures in 20% ethanol  
 5 buffer after 1 h.  $[H_1]=100$  nM,  $[H_2]=100$  nM,  $[T_{HBV}]=50$  nM.

6

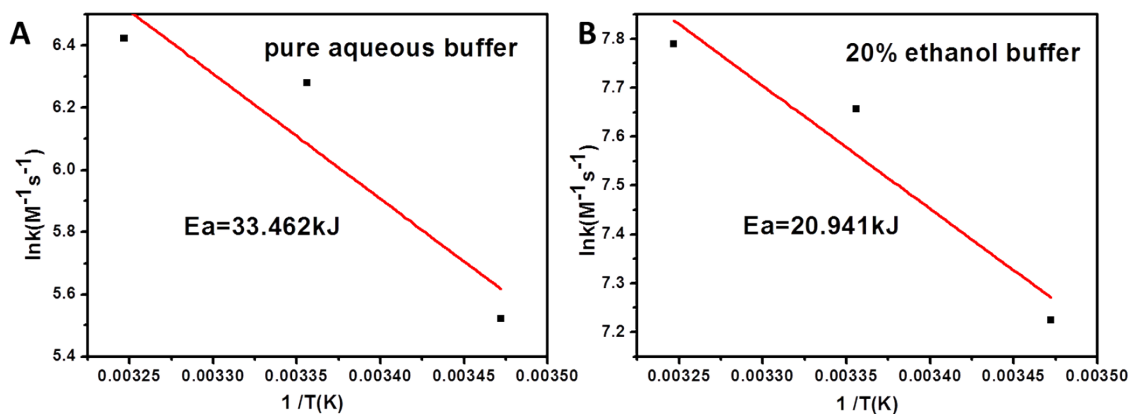

7

8 Fig. S4 (A) Arrhenius plots for the strand exchange reaction in pure aqueous buffer.  
 9 (B) Arrhenius plots for strand exchange reaction in 20% ethanol buffer. Values of  
 10 activation energies ( $E_a$ ) were calculated from the Arrhenius plots.

11

12

13

14

1

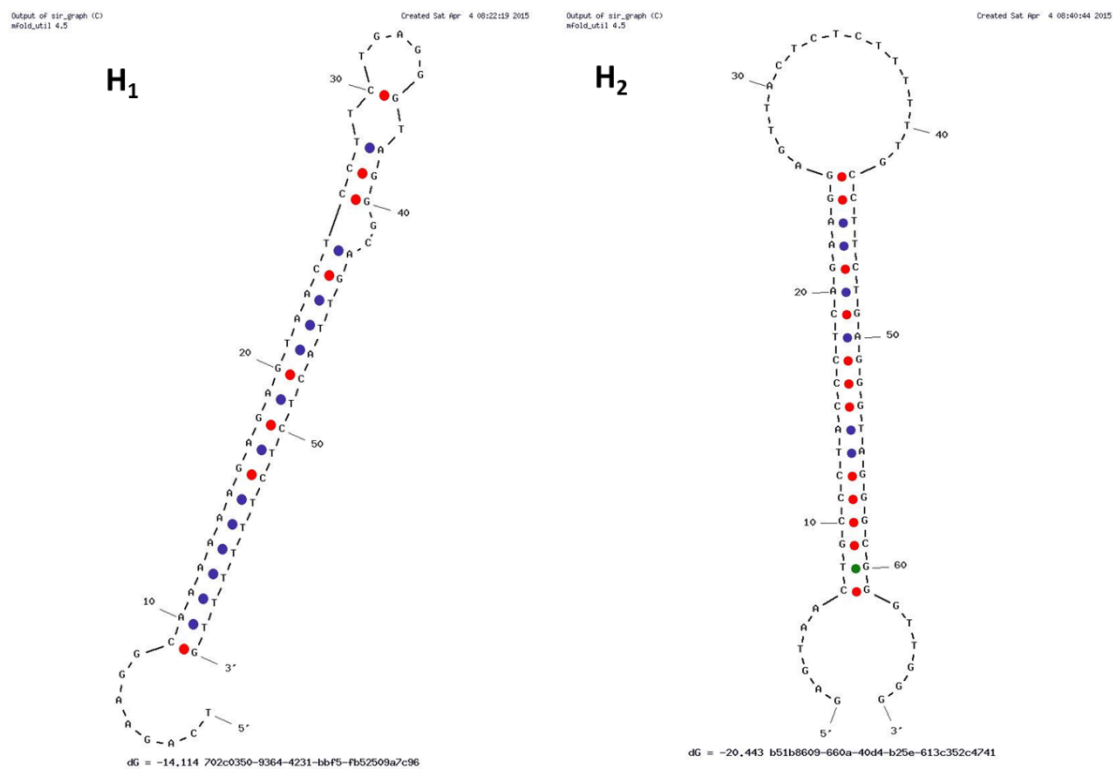

2

3 Fig. S5 Second structure of H<sub>1</sub> and H<sub>2</sub>. H<sub>1</sub>:  $\Delta G=-20.44$  kcal.mole<sup>-1</sup>,  $T_m=72.1^\circ\text{C}$ ,

4  $\Delta H=-149.9$  kcal.mole<sup>-1</sup>,  $\Delta S= -434.21$  cal.K<sup>-1</sup>mole<sup>-1</sup> H<sub>2</sub>:  $\Delta G=-20.44$  kcal.mole<sup>-1</sup>,

5  $T_m=72.1^\circ\text{C}$ ,  $\Delta H=-149.9$  kcal.mole<sup>-1</sup>,  $\Delta S= -434.21$  cal.K<sup>-1</sup>mole<sup>-1</sup>

6

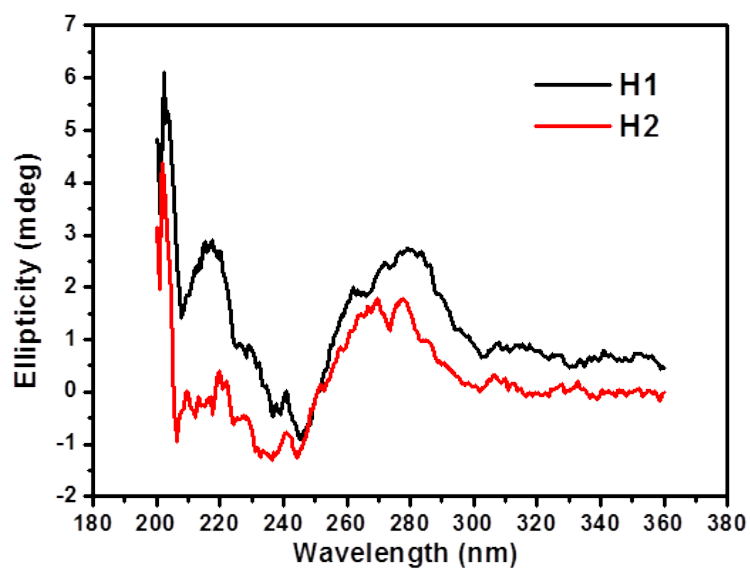

7

8 Fig. S6 CD spectra of H<sub>1</sub> and H<sub>2</sub>. The concentrations of H<sub>1</sub> and H<sub>2</sub> were 1  $\mu\text{M}$ .

1

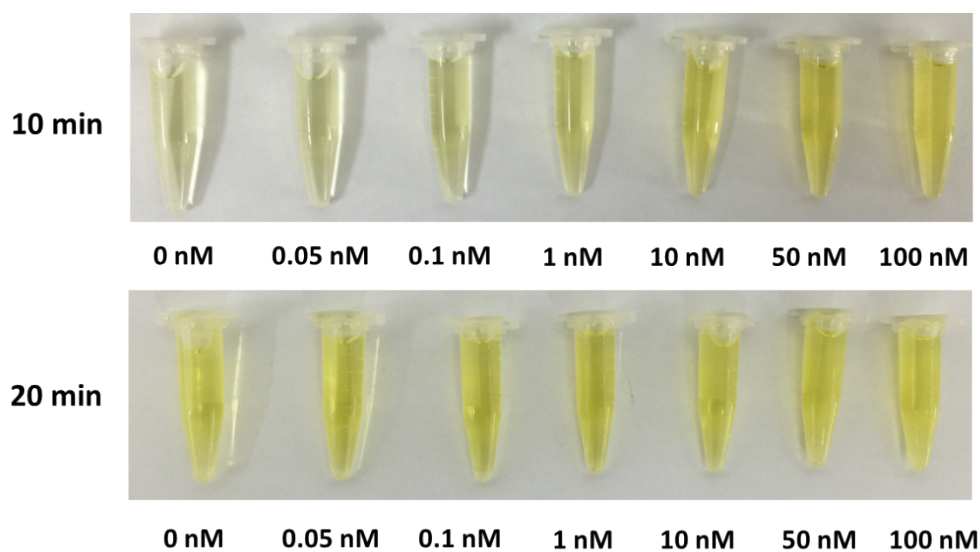

2

3 Fig. S7 Effect of TMB-H<sub>2</sub>O<sub>2</sub> reaction time on the DNAzyme activity

4

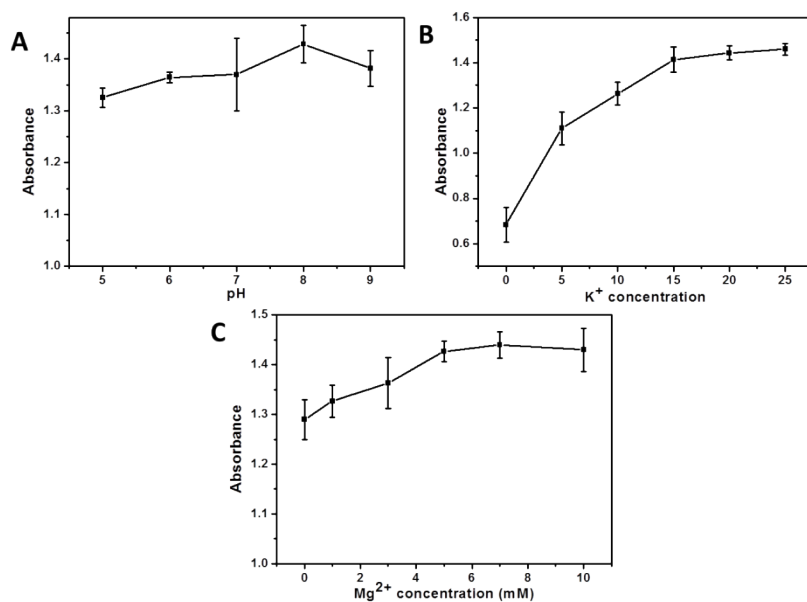

5

6 Fig. S8. Effect of (A) pH, (B) K<sup>+</sup> concentration, (C) Mg<sup>2+</sup> concentration in process of

7 hybridization chain reaction on the absorbance at 452 nm was investigated. The error

8 bars represent the standard deviation of three independent measurements. [H<sub>1</sub>]=100

9 nM, [H<sub>2</sub>]=100 nM, [T<sub>HBV</sub>]=50 nM.

10



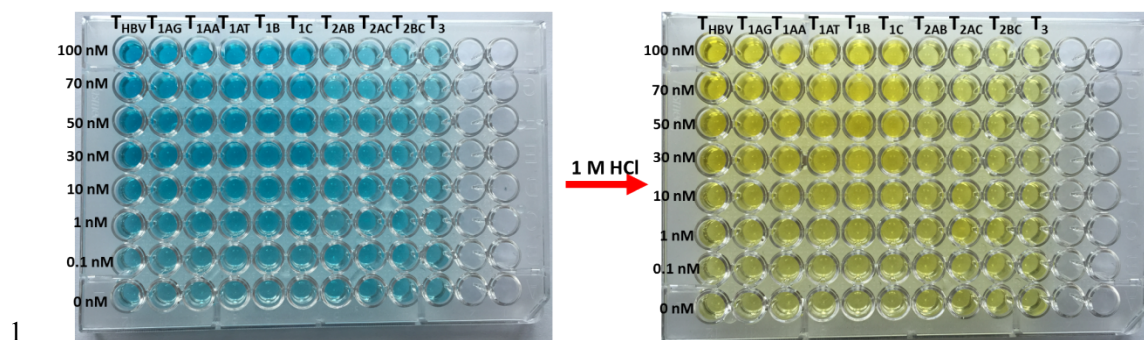

1  
 2 Fig. S9 Array detection for target DNA using multiple of 96 samples. (A) Photo  
 3 images of the solution color change with different concentration mutants of the  
 4 analyte. (B) Photo images of the solution color change with different concentration  
 5 mutants of the analyte after adding 1 M HCl.  $[H_1]=100$  nM,  $[H_2]=100$  nM,  $[T_{HBV}]=50$   
 6 nM.

7 1. J. Kypr, I. Kejnovska, D. Renciuk and M. Vorlickova, *Nucleic Acids Research*, 2009, 37,  
 8 1713-1725.

9 2. N. A. Bagirova, T. N. Shekhovtsova and R. B. van Huystee, *Talanta*, 2001, 55, 1151-1164.

10

11
